# Supplementary material for: High performance thylakoid bio-solar cell using laccase enzymatic biocathodes
Source: Royal Society of Chemistry journal article supplement (doi:10.1039/c3cp51813b), 2013-01-01
Supplement: c3cp51813b.pdf [file c3cp51813b.pdf]

## Supplemental Information for

### High Performance Thylakoid Bio-Solar Cell Using Laccase Enzymatic Biocathodes

Michelle Rasmussen, Alexander Shrier, and Shelley D. Minteer\*

Department of Chemistry and Materials Science and Engineering, University of Utah, 315 S  
1400 E Rm 2020, Salt Lake City, UT 84112

\*Corresponding Author: Phone: (801)587-8325, Email: [minteer@chem.utah.edu](mailto:minteer@chem.utah.edu)

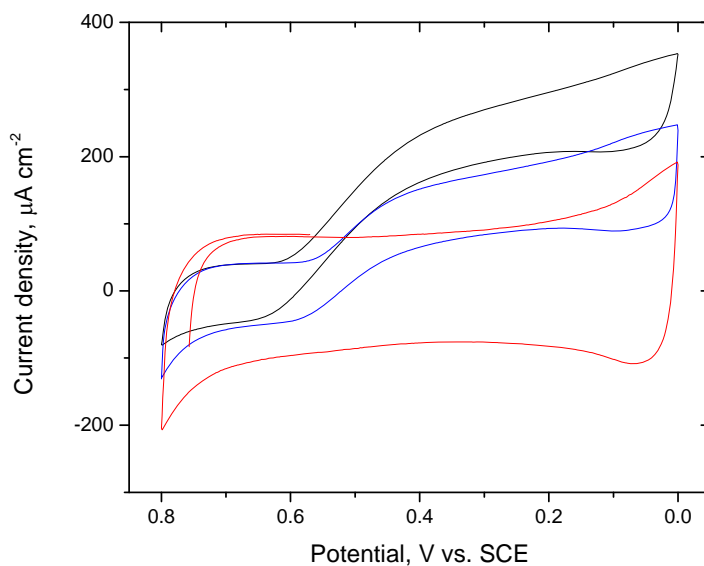

**Fig. S1** Representative cyclic voltammograms of a laccase electrode at 10 mV/s in air saturated citrate buffers with different pHs: 4.5 (black line), 5.5 (blue line), and 6.5 (red line).

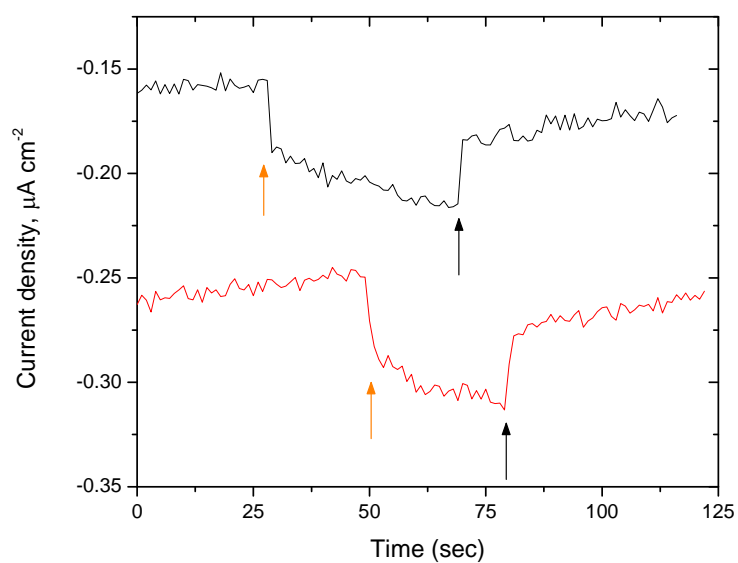

**Fig. S2** Representative amperometric *i-t* curves of a thylakoid electrode at 0.3 V vs. SCE at two different pHs: 7.4 (black line) and 5.5 (red line). Orange arrows indicate when the light was turned on and black arrows when the light was turned off. The oxidative process at the electrode gives an increase in negative current when the light is on and returns to background values when it is turned off.
